# Supplementary material for: Molecular Phylodynamics of the Heterosexual HIV Epidemic in the United Kingdom
Source: PLOS journal article supplement (doi:10.1371/journal.ppat.1000590), 2009-09-25
Supplement: S1 (10.1371/journal.ppat.1000590.s001) [file journal.ppat.1000590.s001]

**Table S1. CD4 count at treatment by HIV subtype<sup>1</sup>**

|        | <i>N</i> | Mean (95% CI) <sup>2</sup> | Comparison with B <sup>3</sup>                  |
|--------|----------|----------------------------|-------------------------------------------------|
| A      | 397      | 219 (207 – 231)            | <i>Z</i> = -1.621<br><i>P</i> = 0.105           |
| C      | 816      | 205 (197 – 213)            | <i>Z</i> = -4.111<br><b><i>P</i> &lt; 0.001</b> |
| others | 659      | 240 (230 – 250)            | <i>Z</i> = -1.169<br><i>P</i> = 0.242           |
| B      | 892      | 228 (220 – 236)            | -                                               |

<sup>1</sup> Data from UK CHIC[23]

<sup>2</sup> Mean of the corrected CD4 count distribution (see Text S1)

<sup>3</sup> Mann-Whitney U test
