# Supplementary material for: Molecular Phylodynamics of the Heterosexual HIV Epidemic in the United Kingdom
Source: PLOS journal article supplement (doi:10.1371/journal.ppat.1000590), 2009-09-25
Supplement: S9 (10.1371/journal.ppat.1000590.s009) [file journal.ppat.1000590.s009]

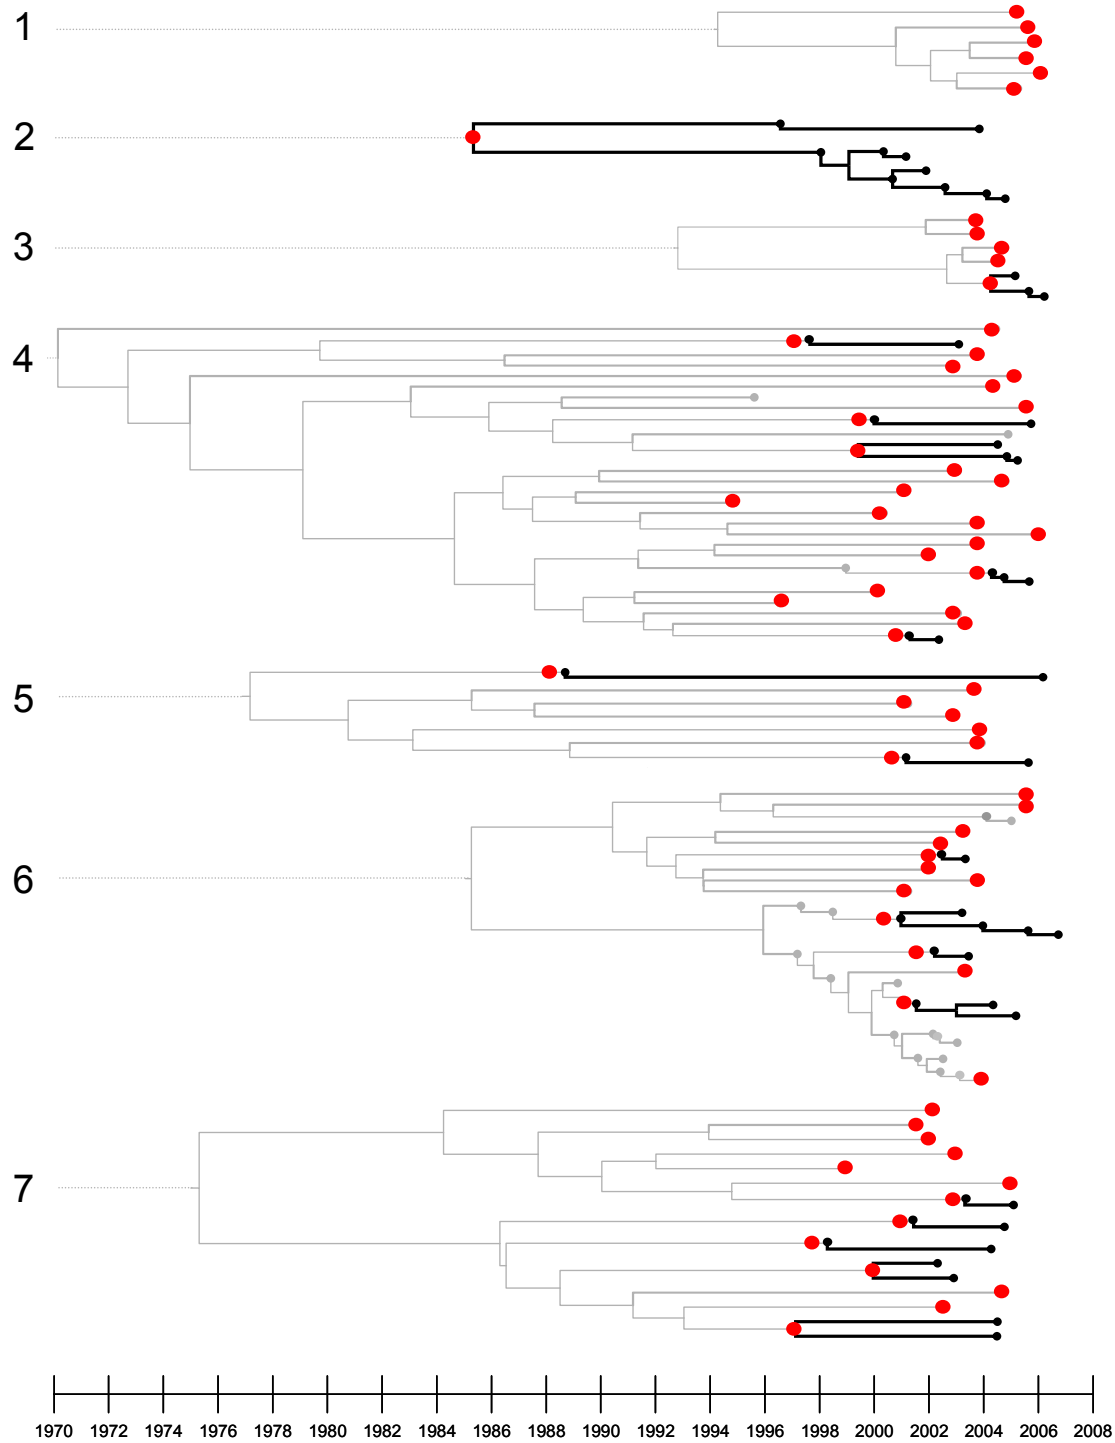

**Figure S8**
